# Supplementary material for: Lung Donation and Transplant Recipient Outcomes at Independent vs Hospital-Based Donor Care Units
Source: PubMed Central journal article supplement (PMC11200140; doi:10.1001/jamanetworkopen.2024.17107), 2024-06-25
Supplement: jamanetwopen-e2417107-s002.pdf [file jamanetwopen-e2417107-s002.pdf]

## Data Sharing Statement

Vail. Lung Donation and Transplant Recipient Outcomes at Independent vs Hospital-Based Donor Care Units. *JAMA Netw Open*. Published June 25, 2024.

doi:10.1001/jamanetworkopen.2024.17107

### Data

**Data available:** No

### Additional Information

**Explanation for why data not available:** Study data, and data dictionary, are publicly available from the Organ Procurement and Transplantation Network. Statistical code used in study analyses are available from the corresponding author upon written request.
